# Supplementary material for: How robust is the metallicity of two dimensional gallium?
Source: Royal Society of Chemistry journal article supplement (doi:10.1039/c8cp05280h), 2018-01-01
Supplement: c8cp05280h1.pdf [file c8cp05280h1.pdf]

# Supporting Information

## How Robust is the Metallicity of Two Dimensional Gallium?

D. Z. Metin, L. Hammerschmidt, and N. Gaston\*

The MacDiarmid Institute for Advanced Materials and Nanotechnology, The  
Department of Physics, The University of Auckland, Private Bag 92019 Auckland  
1142, New Zealand

E-mail: \*n.gaston@auckland.ac.nz

### 1. Electron Localization Function

For determination of electron localization function, single point calculations were completed in VASP from single point calculations from structures of bilayer gallium with differing  $r_1$  and  $r_2$  parameters. Images were created in VESTA [1] using an isosurface value of 0.61.

**Figure 1.** Electron Localization Function for bilayer gallium with a) Decrease of  $r_1$  by 10%, b) Equilibrium structure, c) Increase of  $r_1$  by 10%, d) Decrease of  $r_2$  by 10%, e) Increase of  $r_2$  by 10%, f) Decrease of  $r_1$  by 3.2 and  $r_2$  by 10%, g) Increase of  $r_1$  by 3.4% and  $r_2$  by 10%

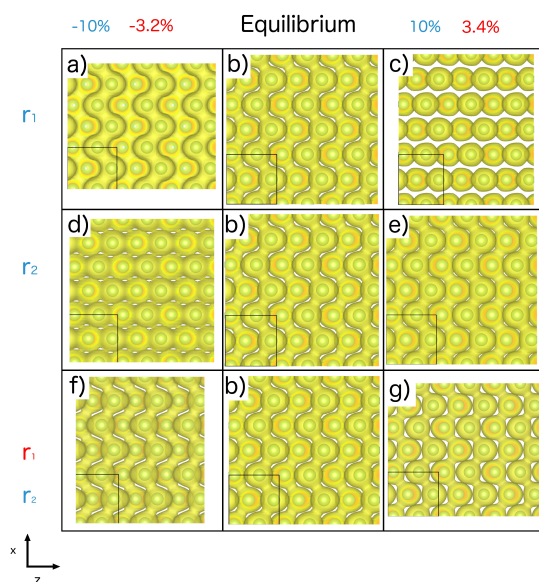

### References

- [1] K. Momma and F. Izumi. Vesta: a three-dimensional visualization system for electronic and structural analysis. *J. Appl. Crystallogr.*, 41(3):653–658, 2008.
